# Supplementary material for: Corticosteroid injection for plantar heel pain: a systematic review and meta-analysis
Source: PubMed Central journal article supplement (PMC6698340; doi:10.1186/s12891-019-2749-z), 2019-08-17
Supplement: 12891_2019_2749_MOESM1_ESM.pdf [file 12891_2019_2749_MOESM1_ESM.pdf]

## Additional file 1. Search strategy.

| MEDLINE and EMBASE (Ovid)                          | CINAHL (EBSCO)                                     | Cochrane Library                                     |
|----------------------------------------------------|----------------------------------------------------|------------------------------------------------------|
| 1. exp ADRENAL CORTEX HORMONES/                    | 1. MH "Adrenal Cortex Hormones+"                   | 1. MeSH Adrenal Cortex Hormones exp                  |
| 2. exp STEROIDS/                                   | 2. MH "Injections+"                                | 2. MeSH Injections exp                               |
| 3. exp INJECTIONS/                                 | 3. MH "Antiinflammatory Agents, Steroidal+"        | 3. MeSH Steroids exp                                 |
| 4. corticosteroid* or injection*                   | 4. corticosteroid* or injection*                   | 4. corticosteroid* or injection*                     |
| 5. #1 or #2 or #3 or #4                            | 5. #1 or #2 or #3 #4                               | 5. #1 or #2 or #3 or #4                              |
| 6. exp FASCIITIS, PLANTAR/                         | 6. MH "plantar fasciitis+"                         | 6. MeSH Fasciitis, Plantar exp                       |
| 7. exp HEEL SPUR/                                  | 7. MH "foot diseases+"                             | 7. MeSH Heel Spur exp                                |
| 8. PLANTAR FASCI*                                  | 8. MH "heel spur+"                                 | 8. "plantar fasci*"                                  |
| 9. (PLANTAR or HEEL or CALCANE*) adj2 PAIN*        | 9. MH calcaneus+                                   | 9. (plantar or heel or cancale*) near pain*          |
| 10. SPUR* or ENTHES* or PERIOSTITIS) adj2 CALCANE* | 10. Plantar fasci*                                 | 10. (spur* or enthes* or periostitis*) near calcane* |
| 11. #6 or #7 or #8 or #9 or #10                    | 11. (plantar or heel or calcane* or foot) N2 pain* | 11. #6 or #7 or #8 or #9 or #10                      |
| 12. #5 and #11                                     | 12. (spur* or enthes* or periostitis) N2 calcane*  | 12. #5 and #11                                       |
| 13. Limit #12 to Human                             | 13. #6 or #7 or #8 or #9 or #10 or #11 or # 12     |                                                      |
|                                                    | 14. #5 and #13                                     |                                                      |
|                                                    | 15. Limit #14 to Human                             |                                                      |

Abbreviations: exp, explode; MH, major heading; MeSH, medical subject headings.
