# Supplementary material for: Corticosteroid injection for plantar heel pain: a systematic review and meta-analysis
Source: PubMed Central journal article supplement (PMC6698340; doi:10.1186/s12891-019-2749-z), 2019-08-17
Supplement: 12891_2019_2749_MOESM3_ESM.pdf [file 12891_2019_2749_MOESM3_ESM.pdf]

### Additional file 3. Results of single trials that investigated pain.

| Comparison                                                                             | Intervention   |              | Comparator     |              | Outcome measure              | Mean difference (95% CI)* |
|----------------------------------------------------------------------------------------|----------------|--------------|----------------|--------------|------------------------------|---------------------------|
|                                                                                        | Mean pain (SD) | Participants | Mean pain (SD) | Participants |                              |                           |
| <b>Short term pain</b>                                                                 |                |              |                |              |                              |                           |
| Corticosteroid injection compared to miniscalpel-needle[1]                             | 4.0 (2.4)      | 30           | 1.6 (2.1)      | 31           | VAS (0-10)                   | 2.4 (1.3, 3.5)            |
| Corticosteroid injection compared to corticosteroid injection plus foot orthoses[2]    | 65.3 (23.7)    | 22           | 49.3 (31.4)    | 28           | VAS (change scores)          | -16.0 (-31.3, -0.7)       |
| Corticosteroid injection compared to a control group[3]                                | 4.4 (2.2)      | 12           | 5.7 (2.8)      | 12           | VAS (0-10)                   | -1.3 (-3.3, 0.7)          |
| Corticosteroid injection compared to ozone injection[4]                                | 26.0 (15.5)    | 15           | 43.3 (18.8)    | 15           | VAS (0-10)                   | -17.3 (-29.6, -4.9)       |
| Corticosteroid injection compared to prolotherapy[5]                                   | 3.2 (2.4)      | 40           | 6.9 (6.5)      | 40           | VAS (0-10)                   | -3.7 (-5.8, -1.5)         |
| <b>Medium term pain</b>                                                                |                |              |                |              |                              |                           |
| Corticosteroid injection compared to corticosteroid injection plus physical therapy[6] | 13.6 (19.1)    | 31           | 10.8 (15.1)    | 29           | VAS (0-10)                   | 0.2 (-0.3, 0.7)           |
| Corticosteroid injection compared to botulinum toxin-A injection[7]                    | 3.6 (1.9)      | 17           | 1.6 (2.1)      | 17           | VAS (0-10)                   | 2.0 (0.6, 3.3)            |
| Corticosteroid injection compared to platelet-rich plasma injection[8]                 | 81.0 (2.0)     | 20           | 95.0 (2.0)     | 20           | AOFAS - Ankle-hindfoot Scale | 14.0 (12.8, 15.2)         |
| Corticosteroid injection compared to extracorporeal shockwave therapy[9]               | 84.0 (6.6)     | 60           | 85.8 (6.8)     | 30           | MCSS                         | 1.8 (-1.6, 5.2)           |
| Corticosteroid injection compared to laser therapy[10]                                 | 3.8 (2.9)      | 30           | 3.2 (2.8)      | 24           | VAS (0-10)                   | 0.6 (-0.9, 2.1)           |
| Corticosteroid injection compared to corticosteroid injection plus foot orthoses[2]    | 61.7 (28.2)    | 22           | 51.4 (28.0)    | 31           | VAS (change scores)          | -10.3 (-25.7, 5.1)        |
| Corticosteroid injection compared to a control group[3]                                | 3.3 (2.7)      | 12           | 6.2 (3.4)      | 12           | VAS (0-10)                   | -2.9 (-5.4, -0.4)         |

| Comparison                                                                             | Intervention   |              | Comparator     |              | Outcome measure              | Mean difference (95% CI)* |
|----------------------------------------------------------------------------------------|----------------|--------------|----------------|--------------|------------------------------|---------------------------|
|                                                                                        | Mean pain (SD) | Participants | Mean pain (SD) | Participants |                              |                           |
| Corticosteroid injection compared to dry-needling[11]                                  | 0.5 (1.3)      | 34           | 1.6 (1.2)      | 32           | VAS (0-10)                   | -1.0 (-1.6, -0.4)         |
| Corticosteroid injection compared to ozone injection[4]                                | 26.0 (19.6)    | 15           | 18.7 (11.2)    | 15           | VAS (0-10)                   | 7.3 (-4.1, 18.7)          |
| Corticosteroid injection compared to prolotherapy[5]                                   | 4.4 (3.5)      | 40           | 2.8 (2.3)      | 40           | VAS (0-10)                   | 1.6 (0.3, 2.9)            |
| <b>Longer term pain</b>                                                                |                |              |                |              |                              |                           |
| Corticosteroid injection compared to corticosteroid injection plus physical therapy[6] | 9.5 (15.3)     | 31           | 1.5 (2.5)      | 31           | VAS (0-10)                   | 0.7 (0.2, 1.2)            |
| Corticosteroid injection compared to botulinum toxin-A injection[7]                    | 3.8 (1.1)      | 17           | 1.1 (1.5)      | 17           | VAS (0-10)                   | 2.7 (1.8, 3.6)            |
| Corticosteroid injection compared to tenoxicam injection[12]                           | 3.1 (2.3)      | 30           | 2.9 (2.0)      | 31           | VAS                          | 0.2 (-0.8, 1.3)           |
| Corticosteroid injection compared to foot orthoses[2]                                  | 63.7 (31.4)    | 22           | 50.6 (28.6)    | 26           | VAS (change scores)          | -13.1 (-30.2, 4.0)        |
| Corticosteroid injection compared to miniscalpel-needle[1]                             | 6.5 (2.7)      | 30           | 1.1 (1.7)      | 31           | VAS                          | 5.4 (4.3, 6.5)            |
| Corticosteroid injection compared to platelet-rich plasma injection[8]                 | 74.0 (2.3)     | 20           | 94.0 (2.2)     | 20           | AOFAS - Ankle-hindfoot Scale | 20.0 (18.6, 21.4)         |
| Corticosteroid injection compared to laser therapy[10]                                 | 3.4 (3.0)      | 30           | 3.2 (3.3)      | 24           | VAS (0-10)                   | 0.2 (-1.5, 1.9)           |
| Corticosteroid injection compared to corticosteroid injection plus foot orthoses[2]    | 63.7 (31.4)    | 22           | 61.3 (27.2)    | 28           | VAS (change scores)          | -2.4 (-18.9, 14.1)        |
| Corticosteroid injection compared to prolotherapy[5]                                   | 6.8 (4.4)      | 40           | 6.5 (6.4)      | 40           | VAS (0-10)                   | 0.1 (-0.4, 0.5)           |

Abbreviations: CI, confidence interval; SD, standard deviation; VAS, visual analogue scale (0 = no pain, 10 = worst pain); AOFAS, American Orthopaedic Foot and Ankle Score (0 = worst pain, 100 = no pain); MCSS, Mayo Clinic Scoring System (0 = worst pain, 100 = no pain).

\* Negative values indicate the comparison favours corticosteroid injection.

## References

1. Li S, Shen T, Liang Y, Zhang Y, Bai B. Miniscalpel-needle versus steroid injection for plantar fasciitis: a randomized controlled trial with a 12-month follow-up. *Evidence-Based Complement Altern Med*. 2014;ID 164714. doi:10.1155/2014/164714.
2. Kriss S. Injectable steroids in the management of heel pain. A prospective randomised trial. *Br J Pod*. 2003;6:40–2.
3. Karimzadeh A, Raeissadat SA, Erfani Fam S, Sedighipour L, Babaei-Ghazani A. Autologous whole blood versus corticosteroid local injection in treatment of plantar fasciitis: a randomized, controlled multicenter clinical trial. *Clin Rheumatol*. 2017;36:661–9. doi:10.1007/s10067-016-3484-6.
4. Babaei-Ghazani A, Karimi N, Forogh B, Madani SP, Ebadi S, Fadavi HR, et al. Comparison of ultrasound-guided local ozone (O<sub>2</sub>-O<sub>3</sub>) injection vs corticosteroid injection in the treatment of chronic plantar fasciitis: a randomized clinical trial. *Pain Med*. 2019;20:314–22. doi:10.1093/pm/pny066.
5. Uğurlar M, Sönmez MM, Uğurlar ÖY, Adıyeke L, Yıldırım H, Eren OT. Effectiveness of four different treatment modalities in the treatment of chronic plantar fasciitis during a 36-month follow-up period: a randomized controlled trial. *J Foot Ankle Surg*. 2018;57:913–8. doi:10.1053/J.JFAS.2018.03.017.

6. Johannsen FE, Herzog RB, Malmgaard-Clausen NM, Hoegberget-Kalisz M, Magnusson SP, Kjaer M. Corticosteroid injection is the best treatment in plantar fasciitis if combined with controlled training. *Knee Surgery, Sport Traumatol Arthrosc.* 2019;27:5–12. doi:10.1007/s00167-018-5234-6.
7. Elizondo-Rodriguez J, Araujo-Lopez Y, Moreno-Gonzalez JA, Cardenas-Estrada E, Mendoza-Lemus O, Acosta-Olivo C. A comparison of botulinum toxin A and intralesional steroids for the treatment of plantar fasciitis. *Foot Ankle Int.* 2013;34:8–14. doi:10.1177/1071100712460215.
8. Monto RR. Platelet-rich plasma efficacy versus corticosteroid injection treatment for chronic severe plantar fasciitis. *Foot Ankle Int.* 2014;35:313–8. doi:10.1177/1071100713519778.
9. Saber N, Diab H, Nassar W, Razaak HA. Ultrasound guided local steroid injection versus extracorporeal shockwave therapy in the treatment of plantar fasciitis. *Alexandria J Med.* 2012;48:35–42. doi:10.1016/j.ajme.2011.11.005.
10. Yuzer S, Sever A, Gurcay E, Unlu E, Cakci A. Comparison of the effectiveness of laser therapy and steroid injection in epin calcanei. *Turkiye Fiz Tip ve Rehabil Derg.* 2006;52:68–71.
11. Rastegar S, Baradaran Mahdavi S, Hoseinzadeh B, Badiei S. Comparison of dry needling and steroid injection in the treatment of plantar fasciitis: a single-blind randomized clinical trial. *Int Orthop.* 2018;42:109–16. doi:10.1007/s00264-017-3681-1.

12. Guner S, Onder H, Guner SI, Ceylan MF, Gökalp MA, Keskin S. Effectiveness of local tenoxicam versus corticosteroid injection for plantar fasciitis treatment. *Orthopedics*. 2013;36:e1322–6. doi:10.3928/01477447-20130920-27.
