# Supplementary material for: Corticosteroid injection for plantar heel pain: a systematic review and meta-analysis
Source: PubMed Central journal article supplement (PMC6698340; doi:10.1186/s12891-019-2749-z), 2019-08-17
Supplement: 12891_2019_2749_MOESM4_ESM.pdf [file 12891_2019_2749_MOESM4_ESM.pdf]

#### Additional file 4. Results of single trials that investigated 'first step' pain.

| Comparison                                                               | Intervention   |              | Comparator     |              | Outcome measure | Mean difference (95% CI)*      |
|--------------------------------------------------------------------------|----------------|--------------|----------------|--------------|-----------------|--------------------------------|
|                                                                          | Mean pain (SD) | Participants | Mean pain (SD) | Participants |                 |                                |
| <b>Short term 'first step' pain</b>                                      |                |              |                |              |                 |                                |
| Corticosteroid injection compared to extracorporeal shockwave therapy[1] | 4.6<br>(2.8)   | 20           | 3.4<br>(2.8)   | 20           | VAS (0-10)      | 1.2 (-0.5, 2.9)                |
| Corticosteroid injection compared to miniscalpel-needle[2]               | 4.2<br>(2.5)   | 30           | 1.7<br>(2.1)   | 31           | VAS (0-10)      | 2.5 (1.3, 3.7)                 |
| Corticosteroid injection compared to platelet-rich plasma injection[3]   | 3.7<br>(1.9)   | 16           | 6.0<br>(2.1)   | 16           | VAS (0-10)      | -2.3 (-3.7, -0.9)              |
| Corticosteroid injection compared to ozone injection[4]                  | 26.7<br>(23.8) | 15           | 54.7<br>(17.7) | 15           | VAS (0-10)      | -28.0 (-43.0, -12.9)           |
| Corticosteroid injection compared to foot orthoses[5]                    | 22.6<br>(22.9) | 50           | 30.6<br>(26.6) | 53           | VAS (0-10)      | -9.2 (-18.8, 0.4) <sup>§</sup> |
| <b>Medium term 'first step' pain</b>                                     |                |              |                |              |                 |                                |
| Corticosteroid injection compared to platelet-rich plasma injection[3]   | 2.3<br>(2.4)   | 16           | 3.9<br>(1.6)   | 16           | VAS (0-10)      | -1.6 (-3.0, -0.2)              |
| Corticosteroid injection compared to ozone injection[4]                  | 25.3<br>(26.4) | 15           | 24.7<br>(11.9) | 15           | VAS (0-10)      | 0.6 (-14.0, 15.2)              |
| Corticosteroid injection compared to foot orthoses[5]                    | 35.3<br>(30.8) | 50           | 19.8<br>(20.0) | 53           | VAS (0-10)      | 13.7 (3.9, 23.5) <sup>§</sup>  |
| <b>Longer term 'first step' pain</b>                                     |                |              |                |              |                 |                                |
| Corticosteroid injection compared to miniscalpel-needle[2]               | 6.6<br>(2.4)   | 30           | 0.9<br>(1.3)   | 31           | VAS (0-10)      | 5.7 (4.7, 6.7)                 |
| Corticosteroid injection compared to platelet-rich plasma injection[3]   | 5.8<br>(2.5)   | 16           | 1.7<br>(1.9)   | 16           | VAS (0-10)      | 4.1 (2.5, 5.6)                 |

Abbreviations: CI, confidence interval; SD, standard deviation; VAS, visual analogue scale (0 = no pain, 10 = worst pain).

\* Negative values indicate the comparison favours corticosteroid injection.

<sup>§</sup> An adjusted mean difference is reported.

## References

- 1 Eslamian F, Shakouri SK, Jahanjoo F, *et al.* Extra corporeal shock wave therapy versus local corticosteroid injection in the treatment of chronic plantar fasciitis, a single blinded randomized clinical trial. *Pain Med* 2016;**17**:1722–31. doi:10.1093/pm/pnw113
- 2 Li S, Shen T, Liang Y, *et al.* Miniscalpel-needle versus steroid injection for plantar fasciitis: a randomized controlled trial with a 12-month follow-up. *Evidence-Based Complement Altern Med* 2014;**ID 164714**. doi:10.1155/2014/164714
- 3 Vahdatpour B, Kianimehr L, Moradi A, *et al.* Beneficial effects of platelet-rich plasma on improvement of pain severity and physical disability in patients with plantar fasciitis: a randomized trial. *Adv Biomed Res* 2016;**5**:179. doi:10.4103/2277-9175.192731
- 4 Babaei-Ghazani A, Karimi N, Forogh B, *et al.* Comparison of ultrasound-guided local ozone (O<sub>2</sub>-O<sub>3</sub>) injection vs corticosteroid injection in the treatment of chronic plantar fasciitis: a randomized clinical trial. *Pain Med* 2019;**20**:314–22. doi:10.1093/pm/pny066
- 5 Whittaker GA, Munteanu SE, Menz HB, *et al.* Effectiveness of foot orthoses versus corticosteroid injection for plantar heel pain: the SOOTHE randomized clinical trial. *J Orthop Sport Phys Ther* 2019;**49**:491–500. doi:10.2519/jospt.2019.8807
