# Supplementary material for: Corticosteroid injection for plantar heel pain: a systematic review and meta-analysis
Source: PubMed Central journal article supplement (PMC6698340; doi:10.1186/s12891-019-2749-z), 2019-08-17
Supplement: 12891_2019_2749_MOESM5_ESM.pdf [file 12891_2019_2749_MOESM5_ESM.pdf]

**Additional file 5. Results of single trials that investigated function.**

| Comparison                                                               | Intervention |              | Comparator  |              | Outcome measure                          | Mean difference (95% CI)*      |
|--------------------------------------------------------------------------|--------------|--------------|-------------|--------------|------------------------------------------|--------------------------------|
|                                                                          | Mean (SD)    | Participants | Mean (SD)   | Participants |                                          |                                |
| <b>Short term function</b>                                               |              |              |             |              |                                          |                                |
| Corticosteroid injection compared to placebo injection[1]                | 6.6 (20.3)   | 41           | 0 (20.3)    | 41           | FHSQ function subscale                   | -6.6 (-15.4, 2.2) <sup>§</sup> |
| Corticosteroid injection compared to ozone injection[3]                  | 76.9 (16.7)  | 15           | 73.2 (15.0) | 15           | FAAM activities of daily living subscale | -3.7 (-15.1, 7.7)              |
| Corticosteroid injection compared to dry needling[4]                     | 28.4 (11.6)  | 47           | 28.3 (8.9)  | 49           | FFI disability subscale                  | 0.1 (-4.0, 4.2)                |
| <b>Medium term function</b>                                              |              |              |             |              |                                          |                                |
| Corticosteroid injection compared to placebo injection[1]                | 4.1 (18.1)   | 41           | 0 (18.1)    | 41           | FHSQ function subscale)                  | -4.1 (-11.9, 3.7) <sup>§</sup> |
| Corticosteroid injection compared to botulinum toxin-A injection[5]      | 84.7 (6.5)   | 17           | 94.9 (7.5)  | 17           | FADI                                     | 10.2 (5.5, 14.9)               |
| Corticosteroid injection compared to ozone injection[3]                  | 78.3 (18.5)  | 15           | 90.7 (9.5)  | 15           | FAAM activities of daily living subscale | 12.4 (1.9, 22.9)               |
| Corticosteroid injection compared to foot orthoses                       | 83.9 (20.4)  | 50           | 87.9 (14.7) | 53           | FHSQ function subscale                   | 2.3 (-3.4, 8.0) <sup>§</sup>   |
| <b>Longer term function</b>                                              |              |              |             |              |                                          |                                |
| Corticosteroid injection compared to physical therapy[6]                 | 83.4 (17.3)  | 21           | 86.7 (21.9) | 22           | FAAM activities of daily living subscale | 3.3 (-8.5, 15.1)               |
| Corticosteroid injection compared to botulinum toxin-A injection[5]      | 83.0 (6.4)   | 17           | 95.0 (7.2)  | 17           | FADI                                     | 12.0 (7.4, 16.6)               |
| Corticosteroid injection compared to extracorporeal shockwave therapy[7] | 43.2 (40.8)  | 40           | 37.0 (35.3) | 39           | FFI-R difficulty subscale                | 6.2 (-10.6, 23.0)              |

| Comparison                                           | Intervention |              | Comparator |              | Outcome measure         | Mean difference (95% CI)* |
|------------------------------------------------------|--------------|--------------|------------|--------------|-------------------------|---------------------------|
|                                                      | Mean (SD)    | Participants | Mean (SD)  | Participants |                         |                           |
| Corticosteroid injection compared to dry needling[4] | 43.1 (11.1)  | 47           | 28.8 (8.8) | 49           | FFI disability subscale | 14.3 (10.3, 18.3)         |

Abbreviations: CI, confidence interval; SD, standard deviation; FHSQ, Foot Health Status Questionnaire (0 = best function, 100 = worst function); FAOS, Foot and Ankle Outcome Score (0 = worst function, 100 = best function); FADI, Foot and Ankle Disability Index (0 = worst function, 100 = best function); FAAM, Foot and Ankle Ability Measure (0 = worst function, 100 = best function); FFI, Foot Function Index (0 = best function, 100 = worst function); FFI-R, Foot Function Index - Revised (0 = best function, 100 = worst function).

\* Negative values indicate the comparison favours corticosteroid injection.

§ An adjusted mean difference is reported.

# Raw values were reported in this trial on a 0 to 136 scale, rather than being converted to a 0 to 100 scale. To ensure consistency between trials, these values were converted to a 0 to 100 scale.

## References

1. McMillan AM, Landorf KB, Gilheany MF, Bird AR, Morrow AD, Menz HB. Ultrasound guided corticosteroid injection for plantar fasciitis: randomised controlled trial. *BMJ*. 2012;344:e3260. doi:10.1136/bmj.e3260.
2. Yucel U, Kucuksen S, Cingoz HT, Anliacik E, Ozbek O, Salli A, et al. Full-length silicone insoles versus ultrasound-guided corticosteroid injection in the management of plantar fasciitis: a randomized clinical trial. *Prosthet Orthot Int*. 2013;37:471–6. doi:10.1177/0309364613478328.
3. Babaei-Ghazani A, Karimi N, Forogh B, Madani SP, Ebadi S, Fadavi HR, et al. Comparison of ultrasound-guided local ozone (O2-O3) injection vs corticosteroid injection in the treatment of chronic plantar fasciitis: a randomized clinical trial. *Pain Med*. 2019;20:314–22. doi:10.1093/pm/pny066.

4. Uygur E, Aktaş B, Eceviz E, Yilmazoğlu EG, Poyanli O. Preliminary report on the role of dry needling versus corticosteroid injection, an effective treatment method for plantar fasciitis: a randomized controlled trial. *J Foot Ankle Surg.* 2018;58:301–5. doi:10.1053/J.JFAS.2018.08.058.
5. Elizondo-Rodriguez J, Araujo-Lopez Y, Moreno-Gonzalez JA, Cardenas-Estrada E, Mendoza-Lemus O, Acosta-Olivo C. A comparison of botulinum toxin A and intralesional steroids for the treatment of plantar fasciitis. *Foot Ankle Int.* 2013;34:8–14. doi:10.1177/1071100712460215.
6. Celik D, Kus G, S rma SO. Joint mobilization and stretching exercise vs steroid injection in the treatment of plantar fasciitis: a randomized controlled study. *Foot Ankle Int.* 2016;37:150–6. doi:10.1177/1071100715607619.
7. Uğurlar M, Sönmez MM, Uğurlar ÖY, Adıyeke L, Yıldırım H, Eren OT. Effectiveness of four different treatment modalities in the treatment of chronic plantar fasciitis during a 36-month follow-up period: a randomized controlled trial. *J Foot Ankle Surg.* 2018;57:913–8. doi:10.1053/J.JFAS.2018.03.017.
