# Supplementary material for: Corticosteroid injection for plantar heel pain: a systematic review and meta-analysis
Source: Springer Nature journal article supplement (doi:10.1186/s12891-019-2749-z), 2019-08-17
Supplement: MOESM6 [file 17079076]

## Additional file 6. Results of single trials that investigated plantar fascia thickness.

| Comparison                                                         | Intervention |              | Comparator   |              | Outcome measure                            | Mean difference (95% CI)* |
|--------------------------------------------------------------------|--------------|--------------|--------------|--------------|--------------------------------------------|---------------------------|
|                                                                    | Mean (SD)    | Participants | Mean (SD)    | Participants |                                            |                           |
| Corticosteroid injection compared to physical therapy[1]           | 3.8<br>(0.4) | 28           | 4.3<br>(0.8) | 28           | Thickness (mm) using diagnostic ultrasound | -0.5 (-0.8, -0.2)         |
| Corticosteroid injection compared to autologous blood injection[2] | 3.4<br>(1.1) | 21           | 4.3<br>(1.1) | 28           | Thickness (mm) using diagnostic ultrasound | -0.9 (-1.5, -0.3)         |
| Corticosteroid injection compared to ozone injection[5]            | 3.8<br>(0.3) | 15           | 4.6<br>(0.6) | 15           | Thickness (mm) using diagnostic ultrasound | -0.7 (-1.1, -0.4)         |

Abbreviations: CI, confidence interval; SD, standard deviation; mm, millimetres.

\* Negative values indicate the comparison favours corticosteroid injection.

## References

- 1 Ryan M, Hartwell J, Fraser S, *et al.* Comparison of a physiotherapy program versus dexamethasone injections for plantar fasciopathy in prolonged standing workers. *Clin J Sport Med* 2014;**24**:211–7. doi:10.1097/JSM.000000000000021
- 2 Yesiltas F, Aydogan U, Parlak A, *et al.* The comparison of intralesionary steroid injection and autologous venous blood injection in patients with plantar fasciitis. *Acta Medica Mediterr* 2015;**31**:711–6.

- 3 Yucel U, Kucuksen S, Cingoz HT, *et al.* Full-length silicone insoles versus ultrasound-guided corticosteroid injection in the management of plantar fasciitis: a randomized clinical trial. *Prosthet Orthot Int* 2013;**37**:471–6.  
doi:10.1177/0309364613478328
- 4 Vahdatpour B, Kianimehr L, Moradi A, *et al.* Beneficial effects of platelet-rich plasma on improvement of pain severity and physical disability in patients with plantar fasciitis: a randomized trial. *Adv Biomed Res* 2016;**5**:179. doi:10.4103/2277-9175.192731
- 5 Babaei-Ghazani A, Karimi N, Forogh B, *et al.* Comparison of ultrasound-guided local ozone (O<sub>2</sub>-O<sub>3</sub>) injection vs corticosteroid injection in the treatment of chronic plantar fasciitis: a randomized clinical trial. *Pain Med* 2019;**20**:314–22.  
doi:10.1093/pm/pny066
